# Supplementary material
Source: PubMed Central journal article supplement (PMC6435255)
Supplement: NIHMS1511922-supplement-2.pdf [file NIHMS1511922-supplement-2.pdf]

## Reporting Summary

Nature Research wishes to improve the reproducibility of the work that we publish. This form provides structure for consistency and transparency in reporting. For further information on Nature Research policies, see [Authors & Referees](#) and the [Editorial Policy Checklist](#).

### Statistical parameters

When statistical analyses are reported, confirm that the following items are present in the relevant location (e.g. figure legend, table legend, main text, or Methods section).

n/a | Confirmed

- The exact sample size ( $n$ ) for each experimental group/condition, given as a discrete number and unit of measurement
- An indication of whether measurements were taken from distinct samples or whether the same sample was measured repeatedly
- The statistical test(s) used AND whether they are one- or two-sided  
*Only common tests should be described solely by name; describe more complex techniques in the Methods section.*
- A description of all covariates tested
- A description of any assumptions or corrections, such as tests of normality and adjustment for multiple comparisons
- A full description of the statistics including central tendency (e.g. means) or other basic estimates (e.g. regression coefficient) AND variation (e.g. standard deviation) or associated estimates of uncertainty (e.g. confidence intervals)
- For null hypothesis testing, the test statistic (e.g.  $F$ ,  $t$ ,  $r$ ) with confidence intervals, effect sizes, degrees of freedom and  $P$  value noted  
*Give  $P$  values as exact values whenever suitable.*
- For Bayesian analysis, information on the choice of priors and Markov chain Monte Carlo settings
- For hierarchical and complex designs, identification of the appropriate level for tests and full reporting of outcomes
- Estimates of effect sizes (e.g. Cohen's  $d$ , Pearson's  $r$ ), indicating how they were calculated
- Clearly defined error bars  
*State explicitly what error bars represent (e.g. SD, SE, CI)*

*Our web collection on [statistics for biologists](#) may be useful.*

### Software and code

Policy information about [availability of computer code](#)

Data collection

GeneSys Pxi6 V1.5.6.0 was used for WB. Microbeta2 V2.0.0.87 was used for scintillation counting and photon emission detection. Fluostar Optima V1.20-0 was used for fluorescence detection. BD FACSCalibur was used for Flow Cytometry. Agilent LC/MSD chemstation VB.04.03 was used for LC/MS. Bruker Topspin V1.3 was used for NMR.

Data analysis

Microsoft Excel V2011, Graphpad Prism V4.03 and FlowJo V7.5.5 were used to analyze the data in this study.

For manuscripts utilizing custom algorithms or software that are central to the research but not yet described in published literature, software must be made available to editors/reviewers upon request. We strongly encourage code deposition in a community repository (e.g. GitHub). See the Nature Research [guidelines for submitting code & software](#) for further information.

### Data

Policy information about [availability of data](#)

All manuscripts must include a [data availability statement](#). This statement should provide the following information, where applicable:

- Accession codes, unique identifiers, or web links for publicly available datasets
- A list of figures that have associated raw data
- A description of any restrictions on data availability

The datasets generated and analysed during the current study are available from the corresponding author on reasonable request.

## Field-specific reporting

Please select the best fit for your research. If you are not sure, read the appropriate sections before making your selection.

Life sciences  Behavioural & social sciences  Ecological, evolutionary & environmental sciences

For a reference copy of the document with all sections, see [nature.com/authors/policies/ReportingSummary-flat.pdf](https://www.nature.com/authors/policies/ReportingSummary-flat.pdf)

## Life sciences study design

All studies must disclose on these points even when the disclosure is negative.

|                 |                                                                                                                                                                                                                                                                                               |
|-----------------|-----------------------------------------------------------------------------------------------------------------------------------------------------------------------------------------------------------------------------------------------------------------------------------------------|
| Sample size     | Three biological (independent) replicates were used for experiments except mouse study. For the mouse study, at least 5 mice were used for each group. Based on Student T test, for comparison between two groups, a sample size of 5 is efficient to calculate the statistical significance. |
| Data exclusions | No data were excluded from the analyses.                                                                                                                                                                                                                                                      |
| Replication     | In the Figure legend, we stated how many number of replications were performed. All attempts at replication were successful.                                                                                                                                                                  |
| Randomization   | Mice of equal average baseline body weight were randomly allocated to the experiments.                                                                                                                                                                                                        |
| Blinding        | For mice studies, investigators were blinded to group allocation during samples collection and data analysis.                                                                                                                                                                                 |

## Reporting for specific materials, systems and methods

### Materials & experimental systems

| n/a                                 | Involvement in the study                                        |
|-------------------------------------|-----------------------------------------------------------------|
| <input checked="" type="checkbox"/> | <input type="checkbox"/> Unique biological materials            |
| <input type="checkbox"/>            | <input checked="" type="checkbox"/> Antibodies                  |
| <input type="checkbox"/>            | <input checked="" type="checkbox"/> Eukaryotic cell lines       |
| <input checked="" type="checkbox"/> | <input type="checkbox"/> Palaeontology                          |
| <input type="checkbox"/>            | <input checked="" type="checkbox"/> Animals and other organisms |
| <input checked="" type="checkbox"/> | <input type="checkbox"/> Human research participants            |

### Methods

| n/a                                 | Involvement in the study                           |
|-------------------------------------|----------------------------------------------------|
| <input checked="" type="checkbox"/> | <input type="checkbox"/> ChIP-seq                  |
| <input type="checkbox"/>            | <input checked="" type="checkbox"/> Flow cytometry |
| <input checked="" type="checkbox"/> | <input type="checkbox"/> MRI-based neuroimaging    |

## Antibodies

|                 |                                                                                                                                                                                                                                                                                                                                                                                                                                                                                                                                                                                                                                                                                                                                                                                                                    |
|-----------------|--------------------------------------------------------------------------------------------------------------------------------------------------------------------------------------------------------------------------------------------------------------------------------------------------------------------------------------------------------------------------------------------------------------------------------------------------------------------------------------------------------------------------------------------------------------------------------------------------------------------------------------------------------------------------------------------------------------------------------------------------------------------------------------------------------------------|
| Antibodies used | The following antibodies were used for western blot: Ent1 (Santa Cruz, sc377283, mouse, 1:500), FKBP12 (abcam, ab92459, rabbit, 1:1000), FKBP51 (abcam, ab126715, rabbit, 1:1000), GAPDH (Santa cruz, sc20357, goat, 1:3000).                                                                                                                                                                                                                                                                                                                                                                                                                                                                                                                                                                                      |
| Validation      | Anti-ENT1 is a mouse monoclonal IgG2a and recommended for detection of ENT1 of mouse, rat and human origin by Western Blotting. Anti-Ent1 has 3 product citations on the Santa Cruz's website;<br>Anti-FKBP12 has validation statement on the abcam's website. Anti-FKBP12 is a rabbit monoclonal antibody and suitable for WB and ICC;<br>Anti-FKBP51 has validation statement on the abcam's website. Anti-FKBP51 is a rabbit monoclonal antibody and suitable for WB, IP, IHC-P, Flow Cyt and ICC/IF; Anti-FKBP51 has been reference in 1 publication;<br>Anti-GAPDH is a goat polyclonal IgG and recommended for detection of GAPDH of mouse, rat, human, equine, canine, bovine, porcine, abian and feline by WB, IP, IF, IHC(P) and ELISA; Anti-GAPDH has 153 product citations on the Santa Cruz's website. |

## Eukaryotic cell lines

Policy information about [cell lines](#)

|                     |                                                                                                                                                                                                                                                                                                                                                                                                                                                                                                                       |
|---------------------|-----------------------------------------------------------------------------------------------------------------------------------------------------------------------------------------------------------------------------------------------------------------------------------------------------------------------------------------------------------------------------------------------------------------------------------------------------------------------------------------------------------------------|
| Cell line source(s) | Human umbilical vein endothelial cells (HUVEC) were purchased from Lonza (Cat#: C2519A). Jurkat T and HEK293T cells were purchased from ATCC. Human red blood cells were obtained from Fisher Scientific (Cat#: 50-643-497). Swine kidney tubular epithelial cell line PK15 (from ATCC), its derivatives PK15-ENT1 and PK15-ENT2 were provided by Dr. Chung-Ming Tse (Johns Hopkins University School of Medicine). Sf9 cells, a clonal isolate of Spodoptera frugiperda Sf21 insect cells, were purchased from ATCC. |
| Authentication      | None of the cell lines used were authenticated.                                                                                                                                                                                                                                                                                                                                                                                                                                                                       |

Mycoplasma contamination

Commonly misidentified lines (See [ICLAC](#) register)

## Animals and other organisms

Policy information about [studies involving animals](#); [ARRIVE guidelines](#) recommended for reporting animal research

Laboratory animals

Wild animals

Field-collected samples

## Flow Cytometry

### Plots

Confirm that:

- The axis labels state the marker and fluorochrome used (e.g. CD4-FITC).
- The axis scales are clearly visible. Include numbers along axes only for bottom left plot of group (a 'group' is an analysis of identical markers).
- All plots are contour plots with outliers or pseudocolor plots.
- A numerical value for number of cells or percentage (with statistics) is provided.

### Methodology

Sample preparation

Instrument

Software

Cell population abundance

Gating strategy

- Tick this box to confirm that a figure exemplifying the gating strategy is provided in the Supplementary Information.
